# Supplementary material
Source: publisher site journal article supplement (https://www.spandidos-publications.com/4255/downloadSupplementary)
Supplement: Supplementary file 1 [file downloadSupplementary]

## Sheet: Sheet1
Table SIII. Differentially expressed piRNAs in patients and healthy participants.
AccID	P1(TPM)	P2(TPM)	P3(TPM)	N1(TPM)	N2(TPM)	N3(TPM)
pir-35414@tRNA	2090.86	1876.41	1712.91	6690.58	4070.26	3847.39
pir-35413@piRNAcluster	1303.16	1187.44	639.95	1916.39	692.817	4040.72
pir-61648@tRNA	239.462	529.067	853.642	158.939	77.6285	85.7396
pir-61647@tRNA	213.592	522.677	777.295	138.946	62.515	76.5195
pir-60573@tRNA	258.822	950.025	43.6384	271.116	47.8308	26.9343
pir-43773@tRNA	217.567	452.284	79.2403	92.5192	29.9694	16.5526
pir-36742@tRNA	346.517	241.467	292.369	419.264	412.272	1123.04
pir-36339@tRNA	323.528	390.307	163.544	169.395	44.6535	30.7094
pir-43773@piRNAcluster	172.855	504.443	98.1262	148.232	39.2436	21.199
pir-35414@piRNAcluster	154.187	65.3541	92.3399	253.299	418.541	163.348
pir-49124@tRNA	93.3995	211.18	34.3964	82.0627	17.2603	10.5269
pir-35952@piRNAcluster	3.7452	3.32485	0.401827	14.8901	57.8779	42.6157
pir-36340@tRNA	104.866	223.908	10.5279	102.223	27.1356	15.5362
pir-36225@tRNA	92.4776	39.7943	38.4147	96.7018	66.8944	194.058
pir-35407@tRNA	57.8489	19.3257	74.2577	131.166	139.371	47.5524
pir-61646@tRNA	40.621	115.487	138.309	41.9097	38.986	57.1355
pir-33536@tRNA	40.0448	102.967	17.0375	44.5866	6.44042	3.41216
pir-42844@tRNA	55.429	122.968	12.4566	47.6817	18.8919	9.0023
pir-33880@piRNAcluster	36.242	88.8359	19.0466	41.3241	6.86978	3.70256
pir-45030@tRNA	38.3163	73.4585	27.8868	36.3887	10.8199	6.82432
pir-33423@tRNA	33.4763	61.4059	30.3781	32.3734	9.01658	6.02573
pir-33880@tRNA	18.8412	38.8592	10.3671	16.8977	3.17727	1.52458
pir-33415@tRNA	5.41614	17.1957	10.769	4.09895	1.03047	0.580793
pir-35469@tRNA	3.51473	3.22095	5.22375	20.5784	15.5429	8.7119
pir-33415@piRNAcluster	15.4994	33.3524	6.34887	16.6468	1.45983	1.16159
pir-33487@tRNA	1.49808	1.50657	0.0803654	18.8217	2.74791	1.45198
pir-33387@piRNAcluster	0.691422	0.831213	0.0803654	2.42591	8.67309	7.33252
pir-36258@tRNA	1.90141	1.61048	0.241096	1.50574	3.34902	18.5128
pir-35176@piRNAcluster	0.518566	0.779263	0.241096	2.00765	6.95565	7.84071
pir-36256@tRNA	2.36236	1.81828	0.562558	1.67304	4.89472	17.7868
pir-43770@piRNAcluster	15.096	9.507	6.34887	24.9283	27.565	14.8102
pir-33519@tRNA	2.07426	5.55874	2.81279	4.93547	13.7396	13.213
pir-33160@rRNA	1.61332	1.35072	4.82193	3.01148	10.6482	13.5034
pir-33082@rRNA	1.72855	1.92218	5.54522	3.68069	11.9362	13.6486
pir-33437@piRNAcluster	5.18566	5.03923	2.65206	13.217	11.2493	8.20371
P, patients; N, healthy participants; TPM, transcript per million; piRNA, PIWI-interacting RNA.
